# Supplementary material
Source: Springer Nature journal article supplement (https://www.springermedizin.de/resource/supplementary/12943_2013_1510_MOESM4_ESM.pdf/9552302)

### Supplementary Figure 3.

Induction of goblet cells following DBZ treatment correlates with basal MUC2 expression

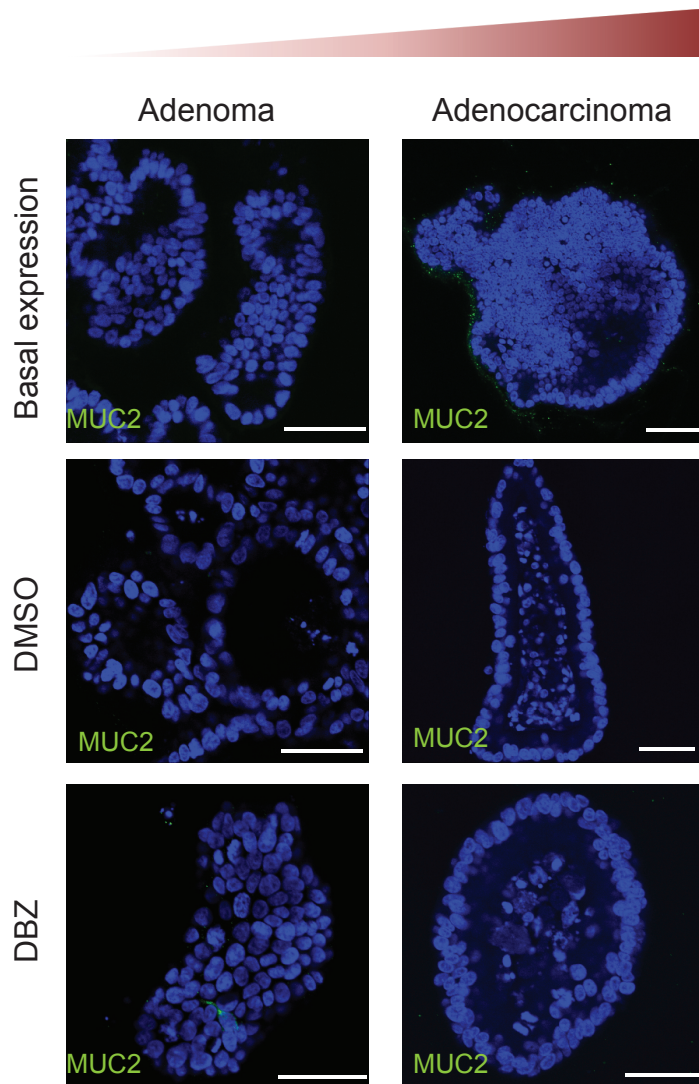

Supplement: MOESM4 [file 9552302]
